# Supplementary material for: Early Insights into the Function of KIAA1199, a Markedly Overexpressed Protein in Human Colorectal Tumors
Source: PubMed Central journal article supplement (PMC3720655; doi:10.1371/journal.pone.0069473), 2013-07-23
Supplement: pone.0069473.s006.pdf [file pone.0069473.s006.pdf]

**Table S1. List of putative KIAA1199 interactors identified by MS after immunoprecipitation. Molecular weight, cellular localization, functions, and number of unique peptide hits obtained on MS for each putative interactor is reported.**

| Protein symbol * | Mol. wt. | Localization                                            | Pathway                                                                                                                                                                   | IP/MS experiment number † |    |         |    |         |    |
|------------------|----------|---------------------------------------------------------|---------------------------------------------------------------------------------------------------------------------------------------------------------------------------|---------------------------|----|---------|----|---------|----|
|                  |          |                                                         |                                                                                                                                                                           | 1                         |    | 2       |    | 3       |    |
|                  |          |                                                         |                                                                                                                                                                           | Control                   | IP | Control | IP | Control | IP |
| <b>FAT1</b>      | 506 kDa  | Membrane, Cell junctions                                | Calcium ion binding, cell adhesion, homophilic cell adhesion, cell-cell signaling, anatomical structure morphogenesis                                                     | 0                         | 1  | 0       | 13 | 0       | 2  |
| <b>ITPR3</b>     | 304 kDa  | Intracellular Membranes, ER, nucleus, nucleoplasm,      | Calcium channel activity, inositol hexakisphosphate binding, G-protein coupled receptor protein signaling pathway                                                         | 0                         | 0  | 0       | 1  | 0       | 1  |
| <b>SERPINE1</b>  | 45 kDa   | Plasma Membrane, Extracellular Matrix, Soluble fraction | Response to ROS, Chronological cell aging, platelet degranulation, blood coagulation, regulation of receptor activity                                                     | 0                         | 6  | 1       | 13 | 1       | 6  |
| <b>GART</b>      | 108 kDa  | Cytoplasm                                               | Purine metabolism, 'de novo' IMP biosynthetic process                                                                                                                     | 0                         | 1  | 0       | 2  | 0       | 2  |
| <b>UBR5</b>      | 308 kDa  | Nucleus, intracellular, Soluble fraction                | Cell proliferation, progesterone receptor signaling pathway, response to DNA damage stimulus, ubiquitin-dependent protein catabolic process, protein modification process | 0                         | 0  | 0       | 10 | 0       | 2  |
| <b>HSP90B1</b>   | 92 kDa   | ER, Microsome, Cytosol                                  | Response to hypoxia or stress, protein folding, anti-apoptosis, protein transport                                                                                         | 0                         | 10 | 0       | 8  | 1       | 4  |

|               |        |                                                                                         |                                                                                                                                                                                                   |   |    |   |    |   |   |
|---------------|--------|-----------------------------------------------------------------------------------------|---------------------------------------------------------------------------------------------------------------------------------------------------------------------------------------------------|---|----|---|----|---|---|
| <b>GNAI2</b>  | 40 kDa | Plasma Membrane, Nucleus, cytosol                                                       | Activation of MAPKK activity, adenosine receptor signaling pathway, G-protein coupled receptor protein signaling pathway, inhibition of adenylate cyclase activity by G-protein signaling pathway | 0 | 0  | 1 | 19 | 0 | 8 |
| <b>VCP</b>    | 89 kDa | Proteasome complex, ER                                                                  | Receptor binding, ubiquitin-dependent protein catabolic process, double strand break repair                                                                                                       | 0 | 7  | 1 | 11 | 3 | 5 |
| <b>NME2</b>   | 17 kDa | Nucleus, Cytoplasm, lamellipodium                                                       | Purine metabolism, Pyrimidine metabolism, regulation of transcription, DNA-dependent; cell adhesion                                                                                               | 0 | 2  | 1 | 4  | 0 | 5 |
| <b>GNAI3</b>  | 41 kDa | Intracellular, Plasma Membrane, Cytoplasm, Golgi apparatus                              | G-protein activator peptide, Inhibits Gs & stimulates Gi activity, Selective, competitive P2X antagonist                                                                                          | 0 | 0  | 0 | 7  | 0 | 1 |
| <b>ANXA6</b>  | 76 kDa | Cytoplasm, Apical Plasma Membrane, Melanosome, Perinuclear region of cytoplasm          | Calcium Ion Binding, Calcium dependent phospholipid binding, calcium ion transport, regulation of muscle contraction                                                                              | 0 | 11 | 0 | 2  | 0 | 0 |
| <b>LGALS3</b> | 26 kDa | Extracellular matrix, Nucleus, cytoplasm, Mitochondrial Inner Membrane, plasma Membrane | Skeletal system development, Cell differentiation, Extracellular Matrix Organization.                                                                                                             | 0 | 2  | 0 | 6  | 1 | 4 |

|                |         |                                                                                |                                                                                                                                    |   |   |   |    |   |   |
|----------------|---------|--------------------------------------------------------------------------------|------------------------------------------------------------------------------------------------------------------------------------|---|---|---|----|---|---|
| <b>STOML2</b>  | 39 kDa  | Cytoplasm, Mitochondrion, Mitochondrial Inner Membrane, Cytoskeleton, Membrane | Receptor- binding                                                                                                                  | 0 | 2 | 0 | 6  | 1 | 4 |
| <b>CANX</b>    | 68 kDa  | Cytoplasm, ER (Lumen, Membrane), RER                                           | Calcium Ion Binding, Protein folding, ageing, post translational protein modification                                              | 1 | 8 | 1 | 7  | 1 | 5 |
| <b>MDH2</b>    | 36 kDa  | Nucleus, mitochondrial inner membrane, mitochondrial matrix                    | Protein binding, malate dehydrogenase activity, oxidoreductase activity                                                            | 0 | 8 | 0 | 6  | 2 | 2 |
| <b>IPO5</b>    | 124 kDa | Nucleus, Nuclear pore, nucleolus, cytoplasm                                    | NLS-bearing substrate import into nucleus, intracellular protein transport, interspecies interaction between organisms             | 0 | 2 | 1 | 7  | 1 | 7 |
| <b>ITGB4</b>   | 202 kDa | Plasma Membrane, Integrin Complex                                              | Cell communication, cell adhesion, cell-matrix adhesion, integrin-mediated signaling pathway, multicellular organismal development | 0 | 2 | 2 | 5  | 0 | 6 |
| <b>SLC25A3</b> | 40 kDa  | Mitochondrial inner membrane, integral to plasma membrane                      | symporter activity, phosphate carrier activity                                                                                     | 1 | 5 | 3 | 20 | 9 | 6 |

|                |         |                                                                  |                                                                                                                                                                                                 |   |   |   |   |   |   |
|----------------|---------|------------------------------------------------------------------|-------------------------------------------------------------------------------------------------------------------------------------------------------------------------------------------------|---|---|---|---|---|---|
| <b>GPI</b>     | 63 kDa  | Extracellular space, nucleus.                                    | Angiogenesis, Carbohydrate Metabolic process, growth factor activity, isomerase activity                                                                                                        | 0 | 4 | 0 | 7 | 3 | 4 |
| <b>LRP1</b>    | 505 kDa | Plasma Membrane, Nucleus, Cytoplasm, Endosome                    | Receptor-mediated endocytosis, Cell Proliferation, Aging, Multicellular Organismal Development, activation of protein kinase C activity by G-protein coupled receptor protein signaling pathway | 0 | 0 | 0 | 2 | 0 | 2 |
| <b>ATP6V1A</b> | 68 kDa  | Mitochondrion, cytosol, microvillus, integral to plasma membrane | hydrolase activity, acting on acid anhydrides, catalyzing transmembrane movement of substance                                                                                                   | 0 | 2 | 0 | 1 | 0 | 1 |
| <b>P4HB</b>    | 57 kDa  | ER-Golgi intermediate compartment, ER lumen                      | Protein disulfide isomerase activity, procollagen-proline 4-dioxygenase activity                                                                                                                | 0 | 4 | 1 | 9 | 3 | 5 |
| <b>ATIC</b>    | 65 kDa  | Mitochondrion, Cytosol                                           | Purine metabolism/biosynthesis                                                                                                                                                                  | 0 | 0 | 0 | 2 | 0 | 5 |
| <b>TPI</b>     | 27 kDa  | Soluble fraction, Nucleus, Cytosol                               | Glycolysis, Gluconeogenesis, Pentose-Phosphate Shunt                                                                                                                                            | 1 | 7 | 1 | 4 | 7 | 5 |
| <b>DNAJC7</b>  | 56 kDa  | Nucleus, Cytoplasm, Cytoskeleton                                 | Chaperone cofactor-dependent protein refolding                                                                                                                                                  | 0 | 0 | 0 | 3 | 0 | 2 |
| <b>HYOU1</b>   | 111 kDa | ER, ER Lumen                                                     | Response to hypoxia/stress, ATP binding                                                                                                                                                         | 0 | 2 | 0 | 1 | 1 | 3 |

|               |         |                                                                    |                                                                                                                                                                                                                   |   |   |   |    |   |    |
|---------------|---------|--------------------------------------------------------------------|-------------------------------------------------------------------------------------------------------------------------------------------------------------------------------------------------------------------|---|---|---|----|---|----|
| <b>PSMD1</b>  | 106 kDa | Proteasome complex, Proteasome regulatory particle                 | Cell cycle check-point, G1/S transition, S-phase, M/G1 transition of mitotic cycle                                                                                                                                | 0 | 1 | 0 | 3  | 1 | 3  |
| <b>ITGA6</b>  | 127 kDa | Plasma membrane, cell-cell adherens junction, integrin complex,    | Cell-substrate junction assembly, integrin-mediated signaling pathway, Blood coagulation, cell-adhesion, cell-matrix adhesion                                                                                     | 0 | 2 | 0 | 6  | 2 | 4  |
| <b>HSPA4</b>  | 70 kDa  | Nucleus, Cytoplasm                                                 | Response to unfolded protein, response to heat, cellular chaperone-mediated protein complex assembly, protein import into mitochondrial outer membrane, mitochondrial outer membrane translocase complex assembly | 0 | 3 | 1 | 3  | 2 | 8  |
| <b>AP1G1</b>  | 91 kDa  | Golgi membrane, cytoplasm, lysosomal membrane, trans-golgi network | Intracellular protein transport, endocytosis, viral reproduction, post-Golgi vesicle mediated transport                                                                                                           | 0 | 1 | 0 | 1  | 0 | 3  |
| <b>EPHA2</b>  | 108 kDa | Plasma Membrane, Integral to plasma Membrane                       | Skeletal system development, Blood vessel development, vasculogenesis, protein phosphorylation, apoptosis, ephrin receptor signaling pathway                                                                      | 0 | 0 | 0 | 2  | 0 | 2  |
| <b>PPP6R3</b> | 98 kDa  | Nucleus, Cytoplasm                                                 | Regulation of phosphoprotein phosphatase activity                                                                                                                                                                 | 0 | 1 | 5 | 11 | 2 | 10 |

|               |         |                                                                           |                                                                                                                                                                        |   |   |   |   |   |   |
|---------------|---------|---------------------------------------------------------------------------|------------------------------------------------------------------------------------------------------------------------------------------------------------------------|---|---|---|---|---|---|
| <b>TKT</b>    | 68 kDa  | Nucleus,<br>Cytoplasm                                                     | Glucose, thiamin metabolic process                                                                                                                                     | 0 | 1 | 0 | 1 | 0 | 2 |
| <b>PSMD11</b> | 47 kDa  | Proteasome<br>complex                                                     | Protein binding                                                                                                                                                        | 0 | 0 | 1 | 8 | 0 | 2 |
| <b>GARS</b>   | 83 kDa  | Soluble<br>fraction<br>cytoplasm,<br>mitochondrion                        | Translation, tRNA aminoacylation for protein<br>translation, glycyl-tRNA aminoacylation, cell<br>death, gene expression                                                | 0 | 2 | 1 | 3 | 1 | 4 |
| <b>TARDBP</b> | 45 kDa  | Nucleus                                                                   | Transcription from RNA polymerase II<br>promoter, mRNA processing, cell death,<br>RNA splicing, negative regulation by host of<br>viral transcription                  | 0 | 1 | 1 | 5 | 1 | 2 |
| <b>GSTO1</b>  | 28 kDa  | Cytoplasm,<br>cytosol                                                     | Monodehydroascorbate reductase (NADH)<br>activity, glutathione transferase activity                                                                                    | 0 | 1 | 0 | 1 | 0 | 1 |
| <b>BSG</b>    | 42 kDa  | Golgi<br>membrane,<br>Mitochondrion,<br>Plasma<br>Membrane,<br>Sarcolemma | Pyruvate metabolic process, cell surface<br>receptor linked signaling pathway, embryo<br>implantation, blood coagulation,<br>odontogenesis of dentine-containing tooth | 0 | 2 | 2 | 6 | 0 | 1 |
| <b>IPO8</b>   | 120 kDa | Nucleus,<br>Cytoplasm                                                     | Intracellular protein transport, signal<br>transduction, Ran GTPase binding                                                                                            | 0 | 0 | 0 | 1 | 0 | 2 |
| <b>CTSD</b>   | 45 kDa  | Extracellular<br>matrix,<br>mitochondrion,<br>lysosome,                   | Autophagic vacuole assembly, proteolysis,<br>cell death                                                                                                                | 0 | 2 | 0 | 3 | 3 | 1 |
| <b>RAB5C</b>  | 23 kDa  | Intracellular,<br>endosome,<br>plasma<br>membrane                         | GTP catabolic process, intracellular protein<br>transport, nucleocytoplasmic transport,<br>endosome organization, signal transduction                                  | 0 | 1 | 0 | 3 | 2 | 1 |
| <b>PGK1</b>   | 45 kDa  | Cytoplasm                                                                 | Carbohydrate metabolic process, ATP<br>binding                                                                                                                         | 0 | 7 | 0 | 4 | 3 | 3 |

|               |        |                                                                                                                                                             |                                                                                                                                                                |   |   |   |   |   |    |
|---------------|--------|-------------------------------------------------------------------------------------------------------------------------------------------------------------|----------------------------------------------------------------------------------------------------------------------------------------------------------------|---|---|---|---|---|----|
| <b>TIMM50</b> | 40 kDa | Nucleus,<br>mitochondrion,<br>mitochondrial<br>inner<br>membrane,<br>mitochondrial<br>inner membrane<br>presequence<br>translocase<br>complex ,<br>membrane | Release of cytochrome c from<br>mitochondria, protein dephosphorylation,<br>mitochondrial membrane organization,<br>protein transport, transmembrane transport | 1 | 5 | 8 | 9 | 1 | 5  |
| <b>EZR</b>    | 69 kDa | Ruffle, uropod,<br>nucleolus,<br>cytoplasm,<br>cytosol                                                                                                      | Cytoskeletal anchoring at plasma<br>membrane, leukocyte cell-cell adhesion,<br>axon guidance, regulation of cell shape,<br>membrane to membrane docking        | 1 | 8 | 0 | 6 | 5 | 3  |
| <b>RBP1</b>   | 16 kDa | Cytoplasm                                                                                                                                                   | Vitamin A metabolic process, transport,<br>regulation of granulocyte differentiation,<br>response to vitamin A, retinol metabolic<br>process                   | 1 | 6 | 0 | 3 | 0 | 0  |
| <b>CCT2</b>   | 57 kDa | Nucleus but<br>NOT nucleolus,<br>cytoplasm                                                                                                                  | Protein folding, cellular protein metabolic<br>process, 'de novo' posttranslational protein<br>folding                                                         | 0 | 4 | 0 | 7 | 7 | 4  |
| <b>MSN</b>    | 68 kDa | Nucleus,<br>nucleolus,<br>cytoplasm                                                                                                                         | Structural constituent of cytoskeleton, actin<br>binding                                                                                                       | 0 | 8 | 0 | 2 | 0 | 0  |
| <b>GPC1</b>   | 62 kDa | Extracellular<br>matrix, plasma<br>membrane                                                                                                                 | Axon guidance                                                                                                                                                  | 0 | 0 | 0 | 4 | 0 | 1  |
| <b>CCT8</b>   | 60 kDa | Cytoplasm,<br>microtubule org.<br>center                                                                                                                    | ATP binding, ATPase activity, unfolded<br>protein binding                                                                                                      | 0 | 5 | 2 | 9 | 9 | 10 |

|               |         |                                                                                           |                                                                                                              |   |   |   |   |   |   |
|---------------|---------|-------------------------------------------------------------------------------------------|--------------------------------------------------------------------------------------------------------------|---|---|---|---|---|---|
| <b>RARS</b>   | 75 kDa  | Nucleus but NOT nucleolus, cytoplasm, mitochondrion                                       | Arginine-tRNA ligase activity, nucleotide binding, protein binding                                           | 0 | 4 | 5 | 6 | 0 | 6 |
| <b>SNAP23</b> | 23 kDa  | Nucleus but NOT nucleolus, microsomes, Golgi apparatus, plasma membrane enriched fraction | Protein binding                                                                                              | 0 | 0 | 0 | 8 | 0 | 1 |
| <b>SMC4</b>   | 147 kDa | Nucleus but NOT nucleolus, condensin complex                                              | Nucleotide binding, nucleoside-triphosphatase activity, protein binding, protein heterodimerization activity | 0 | 3 | 1 | 5 | 5 | 4 |
| <b>CD109</b>  | 162 kDa | Plasma membrane, anchored to membrane, extracellular region                               | Serine-type endopeptidase inhibitor activity                                                                 | 0 | 0 | 0 | 7 | 0 | 1 |
| <b>PDIA6</b>  | 48 kDa  | ER-Golgi intermediate compartment, plasma membrane, melanosome                            | Protein disulfide isomerase activity, protein binding                                                        | 0 | 5 | 2 | 8 | 5 | 4 |



|                |         |                                                       |                                                                                                     |   |   |   |   |   |   |
|----------------|---------|-------------------------------------------------------|-----------------------------------------------------------------------------------------------------|---|---|---|---|---|---|
| <b>TAGLN2</b>  | 22 kDa  | Plasma membrane, nuclear membrane                     | Protein binding                                                                                     | 0 | 2 | 0 | 4 | 7 | 4 |
| <b>Septin9</b> | 65 kDa  | Cytoplasm, cytoskeleton                               | GTP catabolic process, protein heterooligomerization, cell cycle, cell division                     | 0 | 4 | 1 | 0 | 0 | 2 |
| <b>PSMA3</b>   | 28 kDa  | Nucleus, cytoplasm, proteasome core complex           | Threonine-type endopeptidase activity                                                               | 0 | 3 | 0 | 1 | 0 | 0 |
| <b>ANXA5</b>   | 36 kDa  | Cytoplasm, plasma membrane                            | Phospholipase inhibitor activity, calcium-dependent phospholipid binding                            | 0 | 1 | 0 | 2 | 2 | 0 |
| <b>GNB2</b>    | 37 kDa  | Plasma membrane, perinuclear region of cytoplasm      | G-protein-coupled receptor binding, GTPase activity                                                 | 0 | 0 | 0 | 5 | 0 | 1 |
| <b>KHSRP</b>   | 73 kDa  | Nucleus, cytoplasm                                    | DNA binding, RNA binding, protein binding                                                           | 1 | 5 | 0 | 1 | 0 | 0 |
| <b>MFGE8</b>   | 43 kDa  | Extracellular space, external side of plasma membrane | Phosphatidylserine binding, integrin binding, calcium ion binding, phosphatidylethanolamine binding | 0 | 0 | 0 | 6 | 0 | 1 |
| <b>SMARCC2</b> | 133 kDa | nucleoplasm, chromatin                                | DNA binding, protein binding, transcription co-activator activity                                   | 0 | 2 | 0 | 1 | 3 | 4 |
| <b>CS</b>      | 52 kDa  | Mitochondrial matrix                                  | Citrate (Si)-synthase activity                                                                      | 0 | 2 | 0 | 2 | 4 | 9 |
| <b>SET</b>     | 33 kDa  | Nucleoplasm, cytoplasm, ER                            | Histone binding, transcription repressor activity, protein phosphatase type 2A regulator activity   | 0 | 3 | 0 | 2 | 0 | 0 |

|              |         |                                                  |                                                                                               |   |   |   |   |   |   |
|--------------|---------|--------------------------------------------------|-----------------------------------------------------------------------------------------------|---|---|---|---|---|---|
| <b>HPRT1</b> | 25 kDa  | Cytoplasm, cytosol                               | Hypoxanthine phosphoribosyltransferase activity                                               | 0 | 2 | 0 | 2 | 2 | 1 |
| <b>EIF3E</b> | 52 kDa  | Nucleoplasm, cytoplasm                           | Contributes to translation initiation factor activity                                         | 0 | 0 | 0 | 4 | 0 | 2 |
| <b>CBR1</b>  | 30 kDa  | Cytoplasm                                        | Prostaglandin-E2 9-reductase activity, 15-hydroxyprostaglandin dehydrogenase (NADP+) activity | 0 | 1 | 0 | 2 | 0 | 0 |
| <b>PSMB2</b> | 23 kDa  | Nucleus, cytoplasm, proteasome core complex      | Threonine-type endopeptidase activity                                                         | 0 | 0 | 0 | 2 | 0 | 1 |
| <b>TNPO1</b> | 102 kDa | Nucleus, cytoplasm                               | Protein transporter activity                                                                  | 0 | 0 | 0 | 2 | 0 | 1 |
| <b>UBE3C</b> | 124 kDa | Nucleus, proteasome complex                      | Ubiquitin-protein ligase activity                                                             | 0 | 0 | 0 | 5 | 0 | 1 |
| <b>UGGT1</b> | 177 kDa | ER-Golgi intermediate compartment                | UDP-glucose:glycoprotein glucosyltransferase activity                                         | 0 | 1 | 0 | 4 | 0 | 0 |
| <b>TLN1</b>  | 270 kDa | Cytoplasm, cytosol, centrosome                   | Actin binding, insulin receptor binding, structural constituent of cytoskeleton               | 0 | 1 | 0 | 1 | 0 | 0 |
| <b>QARS</b>  | 88 kDa  | Cytoplasm, cytosol, mitochondrial matrix         | Glutamine-tRNA ligase activity                                                                | 0 | 0 | 0 | 4 | 1 | 4 |
| <b>ALDOA</b> | 39 kDa  | Actin cytoskeleton, platelet alpha granule lumen | Fructose-bisphosphate aldolase activity, actin binding, tubulin binding                       | 0 | 1 | 0 | 6 | 4 | 6 |
| <b>GANAB</b> | 107 kDa | ER lumen, golgi app., melanosome                 | Glucan-1,3-alpha-glucosidase activity                                                         | 0 | 2 | 0 | 9 | 1 | 1 |

|               |         |                                                                            |                                                                                                  |   |   |   |   |   |   |
|---------------|---------|----------------------------------------------------------------------------|--------------------------------------------------------------------------------------------------|---|---|---|---|---|---|
| <b>GMPS</b>   | 77 kDa  | Cytoplasm, cytosol                                                         | GMP synthase (glutamine-hydrolyzing) activity, ATP binding                                       | 0 | 3 | 0 | 1 | 1 | 2 |
| <b>PRPF6</b>  | 107 kDa | Nucleoplasm, spliceosomal complex                                          | Assembly of spliceosomal tri-snRNP, spliceosome assembly, nuclear mRNA splicing, via spliceosome | 0 | 0 | 1 | 8 | 0 | 1 |
| <b>ACADVL</b> | 70 kDa  | Mitochondrial inner membrane, mitochondrial matrix, mitochondrial nucleoid | Long-chain-acyl-CoA dehydrogenase activity                                                       | 0 | 1 | 2 | 6 | 1 | 8 |
| <b>UQCRC2</b> | 48 kDa  | Mitochondrial respiratory chain complex III                                | Metalloendopeptidase activity                                                                    | 0 | 1 | 2 | 4 | 1 | 4 |
| <b>OPA1</b>   | 112 kDa | Mitochondrion                                                              | Nucleotide binding, magnesium ion binding, GTPase activity                                       | 0 | 0 | 2 | 8 | 0 | 2 |
| <b>SRRT</b>   | 101 kDa | Nucleus, nucleoplasm, cytoplasm                                            | Nucleic acid binding, protein binding                                                            | 0 | 0 | 1 | 5 | 0 | 3 |
| <b>FASN</b>   | 273 kDa | Cytoplasm, mitochondrion, Golgi apparatus, plasma membrane, cytosol        | Fatty acid synthase activity                                                                     | 0 | 0 | 1 | 7 | 0 | 4 |
| <b>CAPNS1</b> | 28 kDa  | Cytoplasm, plasma membrane                                                 | Calcium-dependent cysteine-type endopeptidase activity, protein heterodimerization activity      | 0 | 2 | 1 | 4 | 1 | 1 |

|               |         |                                                                    |                                                                                                                  |   |   |   |   |   |   |
|---------------|---------|--------------------------------------------------------------------|------------------------------------------------------------------------------------------------------------------|---|---|---|---|---|---|
| <b>DDX39B</b> | 49 kDa  | Nucleus, spliceosomal complex                                      | ATP-dependent RNA helicase activity                                                                              | 0 | 2 | 0 | 3 | 1 | 1 |
| <b>POLR2B</b> | 134 kDa | Nucleus, nucleoplasm, DNA-directed RNA polymerase II, core complex | DNA-directed RNA polymerase activity, contributes to protein kinase activity                                     | 0 | 0 | 0 | 5 | 1 | 4 |
| <b>CTTND1</b> | 108 kDa | Nucleus, Cytoplasm, Adherens junction                              | Morphogenesis of a branching structure, Cell adhesion, signal transduction, multicellular organismal development | 0 | 0 | 0 | 1 | 0 | 1 |
| <b>PA2G4</b>  | 44 kDa  | Nucleus but not nucleoplasm, ribonucleoprotein complex             | Ubiquitin protein ligase binding, sequence-specific DNA binding transcription factor activity, RNA binding       | 0 | 3 | 0 | 3 | 4 | 1 |
| <b>IARS</b>   | 145 kDa | Nucleus but not nucleolous, cytoplasm                              | Isoleucine-tRNA ligase activity, ATP binding                                                                     | 0 | 4 | 1 | 5 | 4 | 4 |
| <b>ACOT9</b>  | 50 kDa  | Mitochondrion                                                      | Acetyl-CoA hydrolase activity                                                                                    | 0 | 0 | 0 | 1 | 0 | 1 |

\* All peptides met the following criteria in at least 2 out of 3 experiments: a) presence in the KIAA1199 immunoprecipitates (i.e., IP) and absent in control; or b) present at least four-times more frequently in the KIAA1199 immunoprecipitates than in controls.

† Number of unique peptide hits obtained on MS.
