# Supplementary material for: Early Insights into the Function of KIAA1199, a Markedly Overexpressed Protein in Human Colorectal Tumors
Source: PubMed Central journal article supplement (PMC3720655; doi:10.1371/journal.pone.0069473), 2013-07-23
Supplement: pone.0069473.s007.pdf [file pone.0069473.s007.pdf]

**Table S2. Genes whose expression significantly changed (p value <0.025, fold change  $\geq$  1.2) upon doxycycline-induced expression of KIAA1199 in SW480 Clone 13.**

| Transcript ID | Gene Symbol     | RefSeq         | p-value<br>(doxycycline<br>vs. control) | Fold change<br>(doxycycline<br>vs. control) |
|---------------|-----------------|----------------|-----------------------------------------|---------------------------------------------|
| 2382970       | <b>EPHX1</b>    | NM_000120      | 6.10E-05                                | 1.25658                                     |
| 3809732       | <b>NARS</b>     | NM_004539.3    | 0.000139085                             | -1.69503                                    |
| 3631517       | <b>THAP10</b>   | NM_020147      | 0.000292807                             | -1.25279                                    |
| 3733911       | <b>SSTR2</b>    | NM_001050      | 0.000312411                             | -1.33443                                    |
| 3740610       | <b>PRPF8</b>    | NM_006445.3    | 0.000351469                             | -1.46223                                    |
| 3468225       | <b>CCDC53</b>   | NM_016053      | 0.000368365                             | -1.6111                                     |
| 3432641       | <b>C12orf52</b> | BC022092       | 0.000396522                             | 1.2044                                      |
| 3860824       | <b>ZNF569</b>   | NM_152484      | 0.000409502                             | -1.29266                                    |
| 2837970       | <b>ADRA1B</b>   | NM_000679      | 0.000454613                             | 1.26301                                     |
| 2669888       | <b>GORASP1</b>  | NM_031899      | 0.000644523                             | 1.23781                                     |
| 3316234       | <b>NS3BP</b>    | AF435951       | 0.000698923                             | 1.42178                                     |
| 2621275       | <b>KLHL18</b>   | NM_025010      | 0.000709853                             | 1.32045                                     |
| 3604147       | <b>KIAA1199</b> | NM_018689      | 0.0008327                               | 3.47319                                     |
| 3821377       | <b>ZNF441</b>   | NM_152355      | 0.000841967                             | -1.31725                                    |
| 3235932       | <b>PRPF18</b>   | NM_003675      | 0.000857099                             | -1.33081                                    |
| 3015603       | <b>AGFG2</b>    | NM_006076      | 0.000875494                             | 1.21069                                     |
| 3819599       | <b>HNRNPM</b>   | NM_005968.4    | 0.000972584                             | 1.67353                                     |
| 2474706       | <b>SLC4A1AP</b> | NM_018158      | 0.0010313                               | 1.29866                                     |
| 2831968       | <b>IK</b>       | NM_006083.3    | 0.00106488                              | -2.33111                                    |
| 3822122       | <b>NFIX</b>     | NM_002501      | 0.00108186                              | 1.23673                                     |
| 3831698       | <b>ZNF420</b>   | NM_144689      | 0.00111942                              | -1.36974                                    |
| 3630184       | <b>RPL4</b>     | NM_000968.3    | 0.00112372                              | -1.25866                                    |
| 3646226       | <b>UNQ3118</b>  | AY358225       | 0.00116969                              | -1.26107                                    |
| 3319327       | <b>E1F3F</b>    | NM_003754.2    | 0.0012004                               | -1.78875                                    |
| 3203665       | <b>PTENP1</b>   | NR_023917      | 0.00128995                              | -1.49164                                    |
| 3250019       | <b>DDX50</b>    | NM_024045      | 0.0013249                               | -1.37906                                    |
| 3070499       | <b>RNF133</b>   | NM_139175      | 0.0013572                               | 1.29476                                     |
| 2328273       | <b>SERINC2</b>  | NM_178865      | 0.00144492                              | 1.28271                                     |
| 3869361       | <b>ZNF615</b>   | NM_198480      | 0.00149332                              | -1.26857                                    |
| 3654699       | <b>NUPR1</b>    | NM_001042483   | 0.00149652                              | -1.25034                                    |
| 3275590       | <b>GDI2</b>     | NM_001115156.1 | 0.00156722                              | -1.57645                                    |
| 3432333       | <b>PTPN11</b>   | NM_002834      | 0.00161639                              | -1.2001                                     |
| 3713575       | <b>PRPSAP2</b>  | NM_002767      | 0.00166651                              | -1.30394                                    |
| 3897505       | <b>JAG1</b>     | NM_000214      | 0.00179587                              | 1.21656                                     |
| 3548772       | <b>TRIP11</b>   | NM_004239      | 0.00185087                              | -1.43375                                    |
| 3096448       | <b>FNTA</b>     | NM_002027.2    | 0.00192917                              | -1.34012                                    |
| 3214749       | <b>NOL8</b>     | NR_024020      | 0.00195771                              | -1.20174                                    |
| 2908762       | <b>RUNX2</b>    | NM_001024630   | 0.00202544                              | 1.27096                                     |

|         |                 |                |            |          |
|---------|-----------------|----------------|------------|----------|
| 3292448 | <b>HERC4</b>    | NM_022079      | 0.00203528 | -1.23367 |
| 2841322 | <b>ATP6V0E1</b> | NM_003945.3    | 0.00205389 | -2.27778 |
| 3176689 | <b>FLJ44082</b> | NM_207416      | 0.00207454 | -1.31447 |
| 2638676 | <b>EA2F</b>     | NM_018456      | 0.00207909 | -1.30072 |
| 3165780 | <b>IFT74</b>    | NM_025103      | 0.00222291 | -1.5621  |
| 3969081 | <b>TLR7</b>     | NM_016562      | 0.00227297 | -1.40695 |
| 3453732 | <b>TUBA1B</b>   | NM_006082      | 0.00229895 | -1.99173 |
| 3748126 | <b>ATPAF2</b>   | NM_145691      | 0.00241491 | 1.23313  |
| 3667702 | <b>UNQ6484</b>  | AY358233       | 0.00243557 | -1.55148 |
| 3829964 | <b>ZNF30</b>    | NR_024018      | 0.00246349 | -1.52545 |
| 3475511 | <b>DIABLO</b>   | NM_019887      | 0.00246654 | -1.23721 |
| 2409507 | <b>SLC6A9</b>   | NM_201649      | 0.00246822 | 1.23766  |
| 3188147 | <b>OR1J2</b>    | NM_054107      | 0.00249632 | 1.35447  |
| 3475166 | <b>ANAPC5</b>   | NM_001137559.1 | 0.00251568 | 1.35099  |
| 3119945 | <b>GRINA</b>    | NM_000837      | 0.00261111 | 1.23679  |
| 2333671 | <b>ATP6V0B</b>  | NM_001039457.1 | 0.00268712 | 1.61     |
| 2686776 | <b>RPL24</b>    | NM_000986.3    | 0.00272529 | -1.42416 |
| 2360989 | <b>MSTO1</b>    | NM_018116      | 0.00277497 | 1.78437  |
| 2539765 | <b>ITGB1BP1</b> | NM_004763      | 0.00281175 | -1.26933 |
| 2599911 | <b>C2orf24</b>  | NM_015680.4    | 0.00282992 | 1.55705  |
| 3363979 | <b>PSMA1</b>    | NM_148976      | 0.00283523 | -1.32954 |
| 3334847 | <b>C11orf2</b>  | NM_013265      | 0.00288648 | 1.21345  |
| 3986672 | <b>ATG4A</b>    | NM_052936      | 0.00288684 | -1.24712 |
| 3793588 | <b>C18orf55</b> | NM_014177      | 0.00289012 | -1.31215 |
| 3015553 | <b>MEPCE</b>    | NM_019606      | 0.00290032 | 1.25601  |
| 2406395 | <b>PSMB2</b>    | NM_001199779.1 | 0.00293312 | -1.3917  |
| 2333794 | <b>DMAP1</b>    | NM_019100      | 0.00293544 | 1.22155  |
| 3059258 | <b>PCLO</b>     | NM_033026      | 0.00294062 | 1.22694  |
| 3015706 | <b>MOSPD3</b>   | NM_001040097   | 0.00294068 | 1.24219  |
| 3973556 | <b>CXorf59</b>  | NM_173695.2    | 0.00295738 | -1.24505 |
| 3070658 | <b>NDUFA5</b>   | NM_005000      | 0.00300053 | -1.75197 |
| 2628482 | <b>FAM19A1</b>  | NM_213609      | 0.00300571 | -1.30627 |
| 3057650 | <b>YWHAG</b>    | NM_012479      | 0.00303374 | 1.31252  |
| 2449922 | <b>ATP6V1G3</b> | NM_133326      | 0.00320127 | -1.25843 |
| 2320472 | <b>CLCN6</b>    | NM_001286      | 0.00321022 | 1.26375  |
| 3448428 | <b>C12orf11</b> | NM_018164      | 0.00324277 | -1.27754 |
| 2974671 | <b>C6orf192</b> | NM_052831      | 0.00326021 | -1.51411 |
| 2775500 | <b>HNRNPD</b>   | NM_001003810.1 | 0.00330473 | 1.35005  |
| 3335795 | <b>SART1</b>    | NM_005146.4    | 0.00338042 | 1.28322  |
| 3333086 | <b>RPLP0</b>    | NM_001002      | 0.00341255 | -1.22835 |
| 2438207 | <b>MEF2D</b>    | NM_005920      | 0.00343095 | 1.32392  |
| 3822805 | <b>TECR</b>     | NM_138501      | 0.0036021  | 1.25726  |
| 3142485 | <b>IMPA1</b>    | NM_001144878   | 0.0036576  | -1.27872 |
| 3577443 | <b>ASB2</b>     | NM_016150      | 0.00374178 | -1.22637 |
| 3355860 | <b>KCNJ5</b>    | NM_000890      | 0.00374776 | 1.24319  |
| 3381682 | <b>CHCHD8</b>   | NM_016565      | 0.00375057 | -1.42524 |

|         |                  |                |            |          |
|---------|------------------|----------------|------------|----------|
| 3347615 | <b>ACAT1</b>     | NM_000019      | 0.00385855 | -1.26418 |
| 4019967 | <b>C1GALT1C1</b> | NM_152692      | 0.00386131 | -1.40809 |
| 3817933 | <b>ZNRF4</b>     | NM_181710      | 0.00386807 | -1.22761 |
| 3079722 | <b>CRYGN</b>     | NM_144727      | 0.0038706  | 1.28026  |
| 2775909 | <b>PLAC8</b>     | NM_016619      | 0.00395353 | -1.39008 |
| 3537884 | <b>ARID4A</b>    | NM_002892      | 0.00400383 | -1.37399 |
| 2600237 | <b>OBSL1</b>     | NM_015311      | 0.00400511 | 1.31829  |
| 3407229 | <b>AEBP2</b>     | NM_153207      | 0.0040423  | -1.38909 |
| 3774635 | <b>FASN</b>      | NM_004104      | 0.0040471  | 1.21742  |
| 3376046 | <b>LRRN4CL</b>   | NM_203422      | 0.00411146 | -1.26159 |
| 2412799 | <b>ORC1L</b>     | NM_004153      | 0.00425054 | 1.21624  |
| 3831774 | <b>ZNF383</b>    | NM_152604      | 0.00434804 | -1.25707 |
| 3629350 | <b>SPG21</b>     | NM_001127889   | 0.00440238 | -1.24942 |
| 2383762 | <b>ARF1</b>      | NM_001024226.1 | 0.00441317 | 1.20932  |
| 3598959 | <b>SMAD3</b>     | NM_005902      | 0.00447211 | 1.22007  |
| 3910347 | <b>SUMO1P1</b>   | NR_002189      | 0.00461002 | -1.24175 |
| 3878934 | <b>NAT5</b>      | NM_016100      | 0.0046792  | -1.27818 |
| 3178583 | <b>CKS2</b>      | NM_001827      | 0.00473185 | -1.29848 |
| 3464000 | <b>CCDC59</b>    | NM_014167      | 0.00491631 | -1.64207 |
| 2950629 | <b>TAPBP</b>     | NM_172208      | 0.00499274 | 1.23341  |
| 3204903 | <b>SPAG8</b>     | NM_172312      | 0.00501365 | 1.35196  |
| 3759540 | <b>DKAKD</b>     | NM_024819      | 0.00508101 | 1.29729  |
| 2901692 | <b>ABCF1</b>     | NM_001025091.1 | 0.00516348 | -1.54492 |
| 3304475 | <b>ARL3</b>      | NM_004311      | 0.00521045 | -1.32901 |
| 3416492 | <b>HNRNPA1L2</b> | NM_001011724.1 | 0.00531014 | 1.59127  |
| 3703598 | <b>FBXO31</b>    | NM_024735      | 0.0053488  | 1.21189  |
| 3748659 | <b>GRAP</b>      | NM_006613      | 0.00541432 | -2.16327 |
| 3226303 | <b>NAIF1</b>     | NM_197956      | 0.00548953 | 1.29444  |
| 3219621 | <b>CTNNAL1</b>   | NM_003798      | 0.00558922 | -1.25157 |
| 2334476 | <b>MAST2</b>     | NM_015112      | 0.00563783 | 1.22695  |
| 3974556 | <b>ATP6AP2</b>   | NM_005765      | 0.00565857 | -1.27802 |
| 3184218 | <b>C9orf6</b>    | NM_017832      | 0.00566372 | -1.38884 |
| 3238761 | <b>MSRB2</b>     | NM_012228      | 0.00570383 | -1.21204 |
| 3733275 | <b>KCNJ2</b>     | NM_000891      | 0.00581487 | -1.25069 |
| 3505449 | <b>MIPEP</b>     | NM_005932      | 0.00583454 | -1.202   |
| 3367183 | <b>LIN7C</b>     | NM_018362      | 0.00584987 | -1.42987 |
| 3743167 | <b>MED31</b>     | NM_016060      | 0.00587165 | -1.47241 |
| 3166844 | <b>CHMP5</b>     | NM_016410      | 0.00593019 | -1.40553 |
| 3389529 | <b>KIAA1826</b>  | NM_032424      | 0.00598323 | -1.324   |
| 2413203 | <b>LRP8</b>      | NM_004631      | 0.00599536 | 1.21248  |
| 3323413 | <b>HTATIP2</b>   | NM_001098522   | 0.00601293 | -1.22497 |
| 3727510 | <b>STXBP4</b>    | NM_178509      | 0.00607881 | -1.32806 |
| 3489350 | <b>CDADC1</b>    | NM_030911      | 0.00613492 | -1.28471 |
| 3532353 | <b>FAM177A1</b>  | NM_001079519   | 0.00615525 | -1.39486 |
| 3741352 | <b>OR3A2</b>     | NM_002551      | 0.00616149 | -1.30315 |
| 2921022 | <b>GPR6</b>      | NM_005284      | 0.0061642  | -1.31322 |

|         |                 |                |            |          |
|---------|-----------------|----------------|------------|----------|
| 2708407 | <b>ALG3</b>     | NM_005787      | 0.00616772 | 1.26582  |
| 3196034 | <b>C9orf66</b>  | NM_152569      | 0.00624781 | -1.77628 |
| 3536396 | <b>CGRRF1</b>   | NM_006568      | 0.00635345 | -1.38361 |
| 3520989 | <b>TGDS</b>     | NM_014305      | 0.00648183 | -1.29708 |
| 3190242 | <b>DNM1</b>     | NM_004408      | 0.00653862 | 1.20565  |
| 3726691 | <b>ABCC3</b>    | NM_003786      | 0.00666346 | 1.21287  |
| 3474521 | <b>SRSF9</b>    | NM_003769.2    | 0.00669331 | -1.32203 |
| 3565663 | <b>DLGAP5</b>   | NM_001146015   | 0.00679526 | -1.22104 |
| 2693569 | <b>ZXDC</b>     | NM_001040653   | 0.00681498 | 1.20603  |
| 2365675 | <b>POU2F1</b>   | NM_002697      | 0.00682415 | 1.26972  |
| 2623388 | <b>PARP3</b>    | NM_001003931   | 0.0068525  | 1.31126  |
| 2736642 | <b>PDHA2</b>    | NM_005390      | 0.00689448 | -1.35472 |
| 3996467 | <b>PLXNA3</b>   | NM_017514      | 0.00690298 | 1.2164   |
| 3428088 | <b>ACTR6</b>    | NM_022496      | 0.00699425 | -1.32686 |
| 3980968 | <b>NONO</b>     | NM_001145408.1 | 0.00702538 | -1.59976 |
| 4011464 | <b>PJA1</b>     | NM_145119      | 0.00705975 | -1.28106 |
| 3831917 | <b>ZNF570</b>   | NM_144694      | 0.00706518 | -1.34366 |
| 2466039 | <b>ZNF692</b>   | NM_017865      | 0.00711941 | 1.30008  |
| 3409127 | <b>ARNTL2</b>   | NM_020183      | 0.00717311 | -1.23393 |
| 3434308 | <b>SIRT4</b>    | NM_012240      | 0.0072454  | -1.31898 |
| 3771744 | <b>MXRA7</b>    | NM_001008528   | 0.00726019 | -1.26664 |
| 3682135 | <b>C16orf63</b> | NM_144600.2    | 0.00726615 | -1.308   |
| 3452664 | <b>P11</b>      | NM_006025      | 0.00745374 | -1.34318 |
| 2904528 | <b>ZNF76</b>    | NM_003427      | 0.00745477 | 1.24241  |
| 3379708 | <b>MRPL21</b>   | NM_181515      | 0.00749611 | -1.33122 |
| 2773872 | <b>NAAA</b>     | NM_014435      | 0.00750028 | 1.2457   |
| 2764678 | <b>FLJ45721</b> | AK127623       | 0.00750823 | -1.20865 |
| 3215146 | <b>NINJ1</b>    | NM_004148      | 0.00757756 | 1.26096  |
| 3489708 | <b>DLEU1</b>    | NR_002605      | 0.00758961 | -1.25501 |
| 3695916 | <b>CENPT</b>    | NM_025082      | 0.00759903 | 1.23671  |
| 3738205 | <b>MRPL12</b>   | NM_002949      | 0.00776853 | 1.27421  |
| 3419473 | <b>RPL14</b>    | NM_001034996.1 | 0.00780536 | 1.97944  |
| 3722917 | <b>GRN</b>      | NM_002087      | 0.00787389 | 1.24911  |
| 3659858 | <b>TMEM188</b>  | NM_153261      | 0.00792477 | -1.52999 |
| 3883129 | <b>MYH7B</b>    | NM_020884      | 0.00793204 | 1.36388  |
| 3457872 | <b>MIP</b>      | NM_012064      | 0.00793296 | -1.35537 |
| 4000538 | <b>FIGF</b>     | NM_004469      | 0.00798477 | -1.29038 |
| 2347132 | <b>FNBP1L</b>   | NM_001024948   | 0.00805351 | -1.27041 |
| 2519860 | <b>ASNSD1</b>   | NM_019048      | 0.00809028 | -1.26439 |
| 3816919 | <b>NFIC</b>     | NM_205843      | 0.00809632 | 1.36525  |
| 3591365 | <b>ADAL</b>     | NM_001159280   | 0.00810711 | -1.35085 |
| 3265952 | <b>PNLIPRP2</b> | NM_005396      | 0.00815182 | -1.42148 |
| 3805553 | <b>RIT2</b>     | NM_002930      | 0.00817236 | -1.35026 |
| 3346584 | <b>BIRC2</b>    | NM_001166      | 0.00822011 | -1.40785 |
| 3635159 | <b>ST20</b>     | NM_001100879   | 0.00825143 | -1.6262  |
| 3468009 | <b>ARL1</b>     | NM_001177      | 0.00825155 | -1.28988 |

|         |                  |                |            |          |
|---------|------------------|----------------|------------|----------|
| 2412690 | <b>KTI12</b>     | NM_138417      | 0.00828238 | 1.24299  |
| 2674303 | <b>RHOA</b>      | NM_001664.2    | 0.00828717 | 1.42995  |
| 3539147 | <b>SNAPC1</b>    | NM_003082      | 0.00829905 | -1.2382  |
| 2451493 | <b>CYB5R1</b>    | NM_016243      | 0.0084029  | 1.24045  |
| 3641112 | <b>FAM169B</b>   | NM_182562      | 0.00842117 | -1.28876 |
| 2325206 | <b>RPL11</b>     | NM_000975.3    | 0.00846021 | -1.86042 |
| 3661645 | <b>IRX6</b>      | NM_024335      | 0.00846513 | -1.26277 |
| 3493448 | <b>PIBF1</b>     | NM_006346      | 0.00852206 | -1.37711 |
| 2831875 | <b>SLC35A4</b>   | NM_080670      | 0.00856094 | 1.40934  |
| 3745781 | <b>ZNF18</b>     | NM_144680      | 0.00857263 | -1.20096 |
| 3844028 | <b>RPS5</b>      | NM_001009.3    | 0.00868604 | -1.27343 |
| 3743502 | <b>CTDNEP1</b>   | NM_001143775.1 | 0.00869325 | -1.28737 |
| 3720132 | <b>RPL19</b>     | NM_000981.3    | 0.00873373 | -1.27382 |
| 3360006 | <b>RHOG</b>      | NM_001665      | 0.00876166 | 1.3358   |
| 3699760 | <b>KARS</b>      | NM_001130089.1 | 0.00876497 | -1.33832 |
| 2954771 | <b>GTPBP2</b>    | NM_019096      | 0.00879405 | 1.276    |
| 2889753 | <b>ZNF354A</b>   | NM_005649      | 0.00879838 | -1.47659 |
| 3045047 | <b>RP9</b>       | NM_203288      | 0.00881491 | -1.40856 |
| 3702547 | <b>COTL1</b>     | NM_021149      | 0.00887136 | 1.3658   |
| 3008108 | <b>LIMK1</b>     | NM_002314      | 0.00889254 | 1.2286   |
| 2359322 | <b>LCE3C</b>     | NM_178434      | 0.0089121  | -1.52035 |
| 3465593 | <b>EEA1</b>      | NM_003566      | 0.00895442 | -1.31101 |
| 3633794 | <b>ETFA</b>      | NM_000126      | 0.00906635 | -1.35697 |
| 3882681 | <b>CHMP4B</b>    | NM_176812      | 0.00907281 | -1.60781 |
| 3969422 | <b>RAB9A</b>     | NM_004251      | 0.00908788 | -1.27952 |
| 3311342 | <b>METTL10</b>   | NM_212554      | 0.00910219 | -1.34524 |
| 3204061 | <b>ENHO</b>      | NM_198573      | 0.009114   | -1.20732 |
| 3303255 | <b>ERLIN1</b>    | NM_006459      | 0.00921481 | -1.21665 |
| 2840638 | <b>NPM1</b>      | NM_001037738.2 | 0.00926559 | -1.6102  |
| 2384375 | <b>DUSP5P</b>    | NR_002834      | 0.00939706 | -1.44612 |
| 2657025 | <b>RTP4</b>      | NM_022147      | 0.00947062 | -1.29191 |
| 2325192 | <b>RPL11</b>     | NM_000975      | 0.00955259 | -1.40953 |
| 3837464 | <b>GLTSCR2</b>   | NM_015710      | 0.00971584 | 1.36898  |
| 2902463 | <b>BAT2</b>      | NM_080686      | 0.00976385 | 1.36986  |
| 2844248 | <b>CANX</b>      | NM_001024649.1 | 0.00981573 | -1.43119 |
| 3752097 | <b>C17orf42</b>  | NM_024683      | 0.00984082 | -1.22054 |
| 3566949 | <b>C14orf149</b> | NM_144581      | 0.0098536  | -1.35639 |
| 3137875 | <b>GGH</b>       | NM_003878      | 0.00986981 | -1.29937 |
| 3602723 | <b>RCN2</b>      | NM_002902      | 0.00987657 | -1.27549 |
| 3844152 | <b>ZNF324</b>    | NM_014347      | 0.00991536 | 1.20254  |
| 3348911 | <b>SDHD</b>      | NM_003002      | 0.00991838 | -1.58489 |
| 3009198 | <b>RHBDD2</b>    | NM_001040457   | 0.00999481 | 1.32359  |
| 3701297 | <b>CDYL2</b>     | NM_152342      | 0.00999576 | -1.23727 |
| 3435192 | <b>MLXIP</b>     | NM_014938      | 0.0100516  | 1.37469  |
| 2835531 | <b>NDST1</b>     | NM_001543      | 0.0101574  | 1.35519  |
| 3144934 | <b>GEM</b>       | NM_005261      | 0.0103277  | -1.3271  |

|         |                    |              |           |          |
|---------|--------------------|--------------|-----------|----------|
| 2439842 | <b>TAGLN2</b>      | NM_003564    | 0.0103993 | 1.22193  |
| 2924619 | <b>TRMT11</b>      | NM_001031712 | 0.0104125 | -1.25029 |
| 3828162 | <b>C19orf2</b>     | NM_003796    | 0.0104538 | -1.33616 |
| 2739267 | <b>RRH</b>         | NM_006583    | 0.0104685 | 1.21549  |
| 3623424 | <b>COPS2</b>       | NM_004236    | 0.0104689 | -1.27299 |
| 3562746 | <b>C14orf106</b>   | NM_018353    | 0.0105625 | -1.44846 |
| 3365437 | <b>TSG101</b>      | NM_006292    | 0.0105847 | -1.37168 |
| 3111375 | <b>TTC35</b>       | NM_014673    | 0.0106337 | -1.64759 |
| 2489372 | <b>hCG_1811732</b> | AK125271     | 0.0106606 | 1.41025  |
| 2812120 | <b>SDCCAG10</b>    | NM_005869    | 0.0106881 | -1.56265 |
| 2438093 | <b>C1orf85</b>     | NM_144580    | 0.0107323 | 1.27506  |
| 3538703 | <b>MNAT1</b>       | NM_002431    | 0.0107361 | -1.43359 |
| 2675171 | <b>HYAL2</b>       | NM_033158    | 0.0107809 | 1.21827  |
| 3258260 | <b>EXOC6</b>       | NM_019053    | 0.0108413 | -1.23037 |
| 2438458 | <b>CRABP2</b>      | NM_001878    | 0.0108718 | 1.33052  |
| 3628923 | <b>FAM96A</b>      | NM_032231    | 0.0108762 | -1.38014 |
| 3755614 | <b>STAC2</b>       | NM_198993    | 0.010908  | -1.29347 |
| 2951500 | <b>TEAD3</b>       | NM_003214    | 0.0109332 | 1.20875  |
| 2533670 | <b>AGAP1</b>       | NM_001037131 | 0.0109469 | 1.30523  |
| 3246182 | <b>SLC18A3</b>     | NM_003055    | 0.0110333 | -1.29373 |
| 2528020 | <b>TTL4</b>        | NM_014640    | 0.0110714 | 1.2317   |
| 3587457 | <b>ARHGAP11A</b>   | NM_014783    | 0.0110915 | -1.24051 |
| 2888698 | <b>LMAN2</b>       | NM_006816    | 0.0110982 | 1.41433  |
| 3720343 | <b>STARD3</b>      | NM_006804    | 0.0111342 | 1.30725  |
| 3664982 | <b>CES2</b>        | NM_003869    | 0.0111427 | 1.2209   |
| 3041519 | <b>TRA2A</b>       | NM_013293    | 0.0113804 | -1.37763 |
| 2619265 | <b>VIPR1</b>       | NM_004624    | 0.0114401 | 1.23824  |
| 3442282 | <b>MLF2</b>        | NR_026581    | 0.0115181 | 1.2661   |
| 3210179 | <b>C9orf95</b>     | NR_023352    | 0.011557  | -1.34046 |
| 3759077 | <b>SLC25A39</b>    | NM_001143780 | 0.0115583 | 1.2574   |
| 3297536 | <b>ANXA11</b>      | NM_145869    | 0.0116289 | 1.20168  |
| 3475324 | <b>TMEM120B</b>    | NM_001080825 | 0.0116619 | 1.60665  |
| 3285614 | <b>ZNF25</b>       | NM_145011    | 0.0116624 | -1.5348  |
| 2981976 | <b>OSTCL</b>       | NM_145303    | 0.0116743 | 1.3381   |
| 2451931 | <b>GOLT1A</b>      | NM_198447    | 0.0119206 | -1.28232 |
| 3894047 | <b>PCMTD2</b>      | NM_018257    | 0.0119407 | -1.20443 |
| 2438282 | <b>IQGAP3</b>      | NM_178229    | 0.0119838 | 1.2194   |
| 2566645 | <b>MITD1</b>       | NM_138798    | 0.0120074 | -1.48736 |
| 3260423 | <b>CUTC</b>        | NM_015960    | 0.0120232 | -1.45199 |
| 3263944 | <b>PDCD4</b>       | NM_145341    | 0.0120464 | -1.26329 |
| 3475717 | <b>RSRC2</b>       | NM_198261    | 0.0120745 | -1.34305 |
| 3248999 | <b>REEP3</b>       | NM_001001330 | 0.0120771 | -1.33516 |
| 3209623 | <b>ZFAND5</b>      | NM_001102420 | 0.0121216 | -1.21178 |
| 3617830 | <b>ZNF770</b>      | NM_014106    | 0.012126  | -1.44875 |
| 3877265 | <b>MACROD2</b>     | NM_080676    | 0.0122187 | -1.27319 |
| 2987843 | <b>SDK1</b>        | NM_152744    | 0.0124468 | 1.34362  |

|         |                  |              |           |          |
|---------|------------------|--------------|-----------|----------|
| 3683651 | <b>ACSM2B</b>    | NM_182617    | 0.0124837 | -2.9554  |
| 2903782 | <b>ITPR3</b>     | NM_002224    | 0.0124842 | 1.40451  |
| 3175119 | <b>OSTF1</b>     | NM_012383    | 0.0125281 | -1.30104 |
| 3308397 | <b>HSPA12A</b>   | NM_025015    | 0.0126946 | 1.26944  |
| 2434124 | <b>HIST2H2BE</b> | NM_003528    | 0.0127198 | 1.28698  |
| 2788143 | <b>ANAPC10</b>   | NM_014885    | 0.0128763 | -1.52138 |
| 3625539 | <b>NEDD4</b>     | NM_006154    | 0.0129137 | -1.221   |
| 4006841 | <b>SLC9A7</b>    | NM_032591    | 0.0129432 | 1.25401  |
| 3283920 | <b>ARHGAP12</b>  | NM_018287    | 0.0129733 | -1.2442  |
| 3003228 | <b>SUMF2</b>     | NM_015411    | 0.0130728 | 1.2814   |
| 2402601 | <b>UBXN11</b>    | NM_183008    | 0.0131845 | 1.20441  |
| 2954022 | <b>TRERF1</b>    | NM_033502    | 0.0132694 | 1.28378  |
| 2685345 | <b>STX19</b>     | NM_001001850 | 0.013314  | 1.59997  |
| 3245881 | <b>WDFY4</b>     | NM_020945    | 0.0133506 | -1.3953  |
| 2900091 | <b>HIST1H2AL</b> | NM_003511    | 0.0133851 | 1.29769  |
| 3591044 | <b>HAUS2</b>     | NM_018097    | 0.0133939 | -1.3829  |
| 3168415 | <b>CLTA</b>      | NM_007096    | 0.013474  | -1.20169 |
| 3306299 | <b>XPNPEP1</b>   | NM_020383    | 0.013525  | -1.38872 |
| 2617687 | <b>XYLB</b>      | NM_005108    | 0.0135407 | 1.28993  |
| 2953536 | <b>TREML2</b>    | NM_024807    | 0.0135765 | 1.42196  |
| 3592023 | <b>B2M</b>       | NM_004048    | 0.0136043 | -1.32426 |
| 3839276 | <b>NR1H2</b>     | NM_007121    | 0.0136426 | 1.28211  |
| 3332530 | <b>MS4A10</b>    | NM_206893    | 0.013769  | -1.2093  |
| 3249788 | <b>CCAR1</b>     | NM_018237    | 0.0137991 | -1.22524 |
| 2904597 | <b>PPARD</b>     | NM_006238    | 0.0138104 | 1.43443  |
| 2361241 | <b>ROBLD3</b>    | NM_014017    | 0.0138112 | -1.32929 |
| 3322251 | <b>NUCB2</b>     | NM_005013    | 0.0139173 | -1.62501 |
| 2975680 | <b>BCLAF1</b>    | NM_014739    | 0.0139824 | -1.26173 |
| 4017381 | <b>TSC22D3</b>   | NM_198057    | 0.0140271 | -1.26384 |
| 2396817 | <b>MTHFR</b>     | NM_005957    | 0.0140847 | 1.25076  |
| 2680298 | <b>MAGI1</b>     | NM_015520    | 0.0141814 | 1.2145   |
| 2862841 | <b>GCNT4</b>     | NM_016591    | 0.0142213 | 1.31643  |
| 3835494 | <b>ZNF226</b>    | NM_001146220 | 0.0143248 | -1.40974 |
| 2379863 | <b>CENPF</b>     | NM_016343    | 0.0144487 | -1.20849 |
| 2480589 | <b>CRIP1</b>     | NM_014171    | 0.014463  | -1.2166  |
| 3007438 | <b>POM121</b>    | NM_172020    | 0.0144814 | 1.38587  |
| 2842255 | <b>CPLX2</b>     | NM_006650    | 0.0145045 | 1.22129  |
| 2453793 | <b>LAMB3</b>     | NM_001017402 | 0.0145059 | 1.23029  |
| 3382972 | <b>RSF1</b>      | NM_016578    | 0.0145841 | -1.24551 |
| 2835848 | <b>SLC36A1</b>   | NM_078483    | 0.014595  | 1.29206  |
| 2436338 | <b>CRTC2</b>     | NM_181715    | 0.0146828 | 1.23049  |
| 3644220 | <b>NDUFB10</b>   | NM_004548    | 0.0147    | -1.30021 |
| 3458097 | <b>NACA</b>      | NM_001113203 | 0.0147832 | 1.24797  |
| 3569200 | <b>ATP6V1D</b>   | NM_015994    | 0.0147955 | -1.21212 |
| 2691798 | <b>IQCB1</b>     | NM_001023570 | 0.0148401 | -1.23094 |
| 3566176 | <b>OTX2</b>      | NM_021728    | 0.0148503 | -1.20716 |

|         |                 |              |           |          |
|---------|-----------------|--------------|-----------|----------|
| 3914050 | <b>STMN3</b>    | NM_015894    | 0.0148549 | -1.28477 |
| 3989089 | <b>ZBTB33</b>   | NM_006777    | 0.0149008 | -1.22288 |
| 2949450 | <b>HSPA1L</b>   | NM_005527    | 0.0149143 | -1.53066 |
| 3554104 | <b>KIF26A</b>   | NM_015656    | 0.0149592 | -1.24051 |
| 2900750 | <b>OR2J3</b>    | NM_001005216 | 0.0149831 | -1.67518 |
| 3772158 | <b>TK1</b>      | NM_003258    | 0.0152196 | 1.28245  |
| 2326448 | <b>SH3BGRL3</b> | NM_031286    | 0.0152569 | 1.21184  |
| 2434925 | <b>PI4KB</b>    | NM_002651    | 0.0152724 | 1.23337  |
| 3474372 | <b>PXN</b>      | NM_001080855 | 0.0152815 | 1.25477  |
| 3959787 | <b>CACNG2</b>   | NM_006078    | 0.01529   | -1.24097 |
| 2676671 | <b>TKT</b>      | NM_001135055 | 0.0153154 | 1.31629  |
| 3527418 | <b>PARP2</b>    | NM_005484    | 0.0154591 | -1.28194 |
| 3504791 | <b>EFHA1</b>    | NM_152726    | 0.0154666 | -1.45653 |
| 4019570 | <b>UPF3B</b>    | NM_080632    | 0.0155781 | -1.42075 |
| 2674047 | <b>LAMB2</b>    | NM_002292    | 0.0155952 | 1.2136   |
| 2322786 | <b>PADI1</b>    | NM_013358    | 0.0156593 | 1.26268  |
| 4004819 | <b>DYNLT3</b>   | NM_006520    | 0.0156746 | -1.51079 |
| 3424174 | <b>MYF5</b>     | NM_005593    | 0.0156844 | -1.2248  |
| 3664785 | <b>CKLF</b>     | NM_016951    | 0.0156904 | -1.21376 |
| 2403111 | <b>WASF2</b>    | NM_006990    | 0.0158457 | 1.22545  |
| 3560711 | <b>BAZ1A</b>    | NM_013448    | 0.0158607 | -1.21047 |
| 2320727 | <b>TNFRSF1B</b> | NM_001066    | 0.0159321 | 1.22092  |
| 3872604 | <b>ZNF606</b>   | NM_025027    | 0.0160529 | -1.32583 |
| 3920816 | <b>DSCR8</b>    | NR_026838    | 0.0161162 | 1.21215  |
| 3434393 | <b>DYNLL1</b>   | NM_001037494 | 0.0161496 | -1.81557 |
| 3865464 | <b>OPA3</b>     | NM_001017989 | 0.016267  | 1.21853  |
| 2624291 | <b>PRKCD</b>    | NM_006254    | 0.0163471 | 1.22119  |
| 2336891 | <b>DIO1</b>     | NM_000792    | 0.016415  | 1.33782  |
| 3148582 | <b>EIF3E</b>    | NM_001568    | 0.0164479 | -1.38751 |
| 3406589 | <b>MGST1</b>    | NM_145791    | 0.0164487 | -1.20198 |
| 3818376 | <b>CLPP</b>     | NM_006012    | 0.0164826 | 1.25284  |
| 3776139 | <b>NDC80</b>    | NM_006101    | 0.0165386 | -1.27717 |
| 3063856 | <b>GATS</b>     | NM_178831    | 0.0166    | 1.22966  |
| 3603408 | <b>PSMA4</b>    | NM_002789    | 0.0166423 | -1.21388 |
| 3688254 | <b>PRSS8</b>    | NM_002773    | 0.0167008 | -1.23669 |
| 3428845 | <b>C12orf48</b> | AK302724     | 0.016717  | -1.45171 |
| 3258910 | <b>HELLS</b>    | NM_018063    | 0.0169054 | -1.22989 |
| 3862471 | <b>AKT2</b>     | NM_001626    | 0.0169968 | 1.21755  |
| 2396461 | <b>SRM</b>      | NM_003132    | 0.0171112 | 1.41795  |
| 3638699 | <b>C15orf38</b> | NM_182616    | 0.0172869 | 1.35396  |
| 3592511 | <b>SQRDL</b>    | NM_021199    | 0.0173972 | -1.27104 |
| 2705014 | <b>SLC7A14</b>  | NM_020949    | 0.0174478 | -1.21861 |
| 3952543 | <b>SLC25A1</b>  | NM_005984    | 0.0174564 | 1.43865  |
| 2675304 | <b>TMEM115</b>  | NM_007024    | 0.0174927 | 1.30322  |
| 2494749 | <b>CNNM3</b>    | NM_017623    | 0.0175323 | 1.31852  |
| 2732068 | <b>SHROOM3</b>  | NM_020859    | 0.0175459 | 1.2256   |



|         |                   |              |           |          |
|---------|-------------------|--------------|-----------|----------|
| 3395416 | <b>HSPA8</b>      | NM_006597    | 0.017558  | 1.47341  |
| 4007186 | <b>ELK1</b>       | NM_001114123 | 0.017693  | 1.32495  |
| 2494709 | <b>CNNM4</b>      | NM_020184    | 0.0177672 | 1.20477  |
| 2731381 | <b>CXCL1</b>      | NM_001511    | 0.0179251 | -1.51902 |
| 2638886 | <b>FAM162A</b>    | NM_014367    | 0.0179391 | -1.26211 |
| 3466284 | <b>NDUFA12</b>    | NM_018838    | 0.0179741 | -1.33986 |
| 2360083 | <b>UBAP2L</b>     | NM_014847    | 0.0179802 | 1.23529  |
| 2674919 | <b>MST1R</b>      | NM_002447    | 0.0180509 | 1.34785  |
| 3134922 | <b>PCMTD1</b>     | NM_052937    | 0.0180557 | -1.32088 |
| 4000704 | <b>AP1S2</b>      | NM_003916    | 0.0180779 | -1.2654  |
| 2758686 | <b>LYAR</b>       | NM_017816    | 0.0181392 | -1.35909 |
| 3729002 | <b>C17orf71</b>   | NM_018149    | 0.0181395 | -1.31881 |
| 3311775 | <b>DHX32</b>      | NM_018180    | 0.018174  | -1.26942 |
| 3282117 | <b>ANKRD26</b>    | NM_014915    | 0.0181958 | -1.41309 |
| 3638204 | <b>MFGE8</b>      | NM_005928    | 0.0182936 | 1.25595  |
| 3708306 | <b>ACADVL</b>     | NM_000018    | 0.0183471 | 1.20455  |
| 3975762 | <b>ZNF673</b>     | NM_001129899 | 0.0184234 | -1.27215 |
| 3183757 | <b>RAD23B</b>     | NM_002874    | 0.01845   | -1.21567 |
| 3957374 | <b>SEC14L4</b>    | NM_174977    | 0.0185394 | 1.26417  |
| 3335327 | <b>SSSCA1</b>     | NM_006396    | 0.0189276 | 1.38556  |
| 3907987 | <b>SLC13A3</b>    | NM_022829    | 0.0189344 | 1.20233  |
| 3264621 | <b>TCF7L2</b>     | NM_001146274 | 0.0190817 | 1.23839  |
| 3015276 | <b>CNPY4</b>      | NM_152755    | 0.019115  | 1.21211  |
| 2326561 | <b>RPS6KA1</b>    | NM_002953    | 0.0192257 | 1.24303  |
| 3251353 | <b>C10orf104</b>  | NM_173473    | 0.0192503 | -1.40368 |
| 3455516 | <b>KRT8</b>       | NM_002273    | 0.0192635 | 1.3785   |
| 4038494 | <b>SETD8</b>      | NM_020382    | 0.0193618 | -1.30554 |
| 3655708 | <b>C16orf53</b>   | NM_024516    | 0.0194605 | -1.2809  |
| 3995392 | <b>ZNF185</b>     | NM_007150    | 0.0194947 | 1.26081  |
| 3851911 | <b>GADD45GIP1</b> | NM_052850    | 0.0195209 | -1.26435 |
| 2473965 | <b>C2orf18</b>    | NM_017877    | 0.0195235 | 1.28255  |
| 3293435 | <b>PRF1</b>       | NM_005041    | 0.0195559 | 1.25594  |
| 3519624 | <b>SLITRK1</b>    | NM_052910    | 0.0196014 | -1.38487 |
| 3991698 | <b>HPRT1</b>      | NM_000194    | 0.0196027 | -1.25789 |
| 3470911 | <b>MGC14436</b>   | NR_026661    | 0.0197395 | -1.28185 |
| 3921391 | <b>WRB</b>        | NM_004627    | 0.0198138 | -1.29817 |
| 3608466 | <b>MAN2A2</b>     | NM_006122    | 0.0198946 | 1.30931  |
| 3796992 | <b>C18orf18</b>   | NR_026849    | 0.0199019 | -1.41736 |
| 4026956 | <b>HCFC1</b>      | NM_005334    | 0.0200391 | 1.27319  |
| 2843579 | <b>RMND5B</b>     | NM_022762    | 0.0201036 | 1.26121  |
| 3014957 | <b>ZNF498</b>     | NM_145115    | 0.0201085 | 1.27236  |
| 2663551 | <b>NUP210</b>     | NM_024923    | 0.0201193 | 1.30894  |
| 3984779 | <b>HNRNPH2</b>    | NM_019597    | 0.0201335 | -1.21495 |
| 3890272 | <b>C20orf106</b>  | NM_001012971 | 0.020193  | -1.61692 |
| 3536336 | <b>CDKN3</b>      | NM_005192    | 0.0202454 | -1.29681 |
| 3860491 | <b>ZNF260</b>     | NM_001012756 | 0.0203274 | -1.2406  |

|         |                 |              |           |          |
|---------|-----------------|--------------|-----------|----------|
| 3509885 | <b>ALG5</b>     | NM_013338    | 0.0204333 | -1.39266 |
| 3407793 | <b>PYROXD1</b>  | NM_024854    | 0.0204672 | -1.67358 |
| 3996404 | <b>GDI1</b>     | NM_001493    | 0.0205397 | 1.30152  |
| 3471224 | <b>GPN3</b>     | NM_016301    | 0.0205409 | -1.33684 |
| 3980981 | <b>ITGB1BP2</b> | NM_012278    | 0.0205595 | 1.27666  |
| 3202136 | <b>C9orf82</b>  | BC071953     | 0.0205734 | -1.23535 |
| 3216969 | <b>XPA</b>      | NR_027302    | 0.0205777 | -1.30994 |
| 2947889 | <b>GABBR1</b>   | NM_001470    | 0.0205866 | 1.24433  |
| 3109191 | <b>POLR2K</b>   | NM_005034    | 0.0206005 | -1.29156 |
| 2421782 | <b>CCBL2</b>    | NM_001008661 | 0.0206517 | -1.29672 |
| 3976639 | <b>PORCN</b>    | NM_022825    | 0.0207674 | 1.2955   |
| 3565571 | <b>WDHD1</b>    | NM_007086    | 0.0207722 | -1.21004 |
| 2833924 | <b>SH3RF2</b>   | NM_152550    | 0.0208233 | 1.44449  |
| 3653000 | <b>UBFD1</b>    | NM_019116    | 0.0208427 | -1.21497 |
| 3421523 | <b>YEATS4</b>   | NM_006530    | 0.0209241 | -1.52697 |
| 2465728 | <b>OR2B11</b>   | NM_001004492 | 0.0209332 | -1.45181 |
| 4016428 | <b>BEX2</b>     | NM_032621    | 0.0209731 | -1.24462 |
| 3337835 | <b>IGHMBP2</b>  | NM_002180    | 0.0211482 | -1.28495 |
| 3617170 | <b>AVEN</b>     | NM_020371    | 0.0211643 | -1.36229 |
| 2680591 | <b>LRIG1</b>    | NM_015541    | 0.0211891 | 1.31424  |
| 3344861 | <b>C11orf54</b> | AK292215     | 0.0212401 | -1.29186 |
| 2459924 | <b>ABCB10</b>   | NM_012089    | 0.0212924 | -1.29222 |
| 2397948 | <b>EPHA2</b>    | NM_004431    | 0.0213082 | 1.28029  |
| 2452754 | <b>SLC26A9</b>  | NM_052934    | 0.0213621 | 1.3707   |
| 3909395 | <b>DPM1</b>     | NM_003859    | 0.0213924 | -1.38114 |
| 3868828 | <b>KLK10</b>    | NM_002776    | 0.021394  | 1.27399  |
| 2693014 | <b>SLC12A8</b>  | NM_024628    | 0.0214515 | 1.3045   |
| 2711751 | <b>TMEM44</b>   | NM_138399    | 0.0214554 | 1.23462  |
| 3536905 | <b>KTN1</b>     | NM_182926    | 0.0214981 | -1.26463 |
| 2948564 | <b>MDC1</b>     | NM_014641    | 0.0215196 | 1.23586  |
| 3453120 | <b>ZNF641</b>   | NM_152320    | 0.0215646 | -1.2112  |
| 3839006 | <b>PTOV1</b>    | NM_017432    | 0.0216546 | 1.27723  |
| 3550485 | <b>VRK1</b>     | NM_003384    | 0.0217487 | -1.3131  |
| 3330943 | <b>OR8K1</b>    | NM_001002907 | 0.0218046 | -1.28651 |
| 3077573 | <b>ARHGEF5L</b> | NM_001003702 | 0.021862  | -1.23428 |
| 3757329 | <b>JUP</b>      | NM_002230    | 0.0220004 | 1.35904  |
| 3869784 | <b>ZNF28</b>    | NM_006969    | 0.0220078 | -1.49625 |
| 3257031 | <b>STAMBPL1</b> | NM_020799    | 0.0220482 | -1.23245 |
| 3319613 | <b>RPL27A</b>   | NM_000990    | 0.0220895 | 1.24725  |
| 3915087 | <b>USP25</b>    | NM_013396    | 0.0221055 | -1.23093 |
| 3300793 | <b>C10orf4</b>  | NM_145246    | 0.0221252 | -1.44928 |
| 3139950 | <b>LACTB2</b>   | NM_016027    | 0.0221483 | -1.5687  |
| 2322103 | <b>SPEN</b>     | NM_015001    | 0.0221993 | 1.23243  |
| 3304385 | <b>C10orf95</b> | BC126459     | 0.0222302 | -1.37339 |
| 3646542 | <b>ALG1</b>     | NM_019109    | 0.0222455 | 1.49366  |
| 3462843 | <b>NAP1L1</b>   | NM_004537    | 0.0223433 | -1.51539 |

|         |                  |              |           |          |
|---------|------------------|--------------|-----------|----------|
| 3105467 | <b>E2F5</b>      | NM_001951    | 0.0223844 | -1.26918 |
| 3928587 | <b>KRTAP21-2</b> | NM_181617    | 0.0224607 | -1.75648 |
| 3816699 | <b>ZNF57</b>     | NM_173480    | 0.0225075 | -1.25758 |
| 3819374 | <b>CCL25</b>     | NM_005624    | 0.0225387 | -1.27726 |
| 3800619 | <b>ROCK1</b>     | NM_005406    | 0.0226313 | -1.34421 |
| 3345774 | <b>JRKL</b>      | NM_003772    | 0.0228398 | -1.25814 |
| 2532894 | <b>DGKD</b>      | NM_152879    | 0.0228573 | 1.26746  |
| 3719112 | <b>ZNHIT3</b>    | NM_004773    | 0.0228592 | -1.32646 |
| 3961042 | <b>FLJ23865</b>  | AK074445     | 0.0229813 | -1.45149 |
| 3290649 | <b>FAM13C</b>    | NM_001143773 | 0.0230358 | -1.22229 |
| 3626704 | <b>SLTM</b>      | NM_024755    | 0.0230447 | -1.45058 |
| 3164086 | <b>ADAMTSL1</b>  | NM_001040272 | 0.0230954 | -1.27235 |
| 2934308 | <b>IGF2R</b>     | NM_000876    | 0.0231106 | 1.22723  |
| 3089102 | <b>EPB49</b>     | NM_001978    | 0.0231818 | 1.20756  |
| 3651478 | <b>ACSM3</b>     | NM_005622    | 0.0232591 | -1.24592 |
| 4045643 | <b>S100A16</b>   | NM_080388    | 0.0233032 | 1.23745  |
| 3444472 | <b>TAS2R50</b>   | NM_176890    | 0.0233914 | 2.96915  |
| 3761378 | <b>HOXB5</b>     | NM_002147    | 0.0234231 | 1.27715  |
| 3971768 | <b>PRDX4</b>     | NM_006406    | 0.0234441 | -1.28535 |
| 2899233 | <b>HIST1H3E</b>  | NM_003532    | 0.0236109 | 1.20146  |
| 2474341 | <b>CAD</b>       | NM_004341    | 0.0236861 | 1.33805  |
| 3914181 | <b>UCKL1</b>     | NM_017859    | 0.0238025 | 1.23085  |
| 3996083 | <b>TMEM187</b>   | NM_003492    | 0.0239496 | -1.25304 |
| 3463522 | <b>PAWR</b>      | NM_002583    | 0.0240481 | -1.29544 |
| 3722535 | <b>ARL4D</b>     | NM_001661    | 0.0240746 | -1.21445 |
| 3258168 | <b>KIF11</b>     | NM_004523    | 0.0240974 | -1.2843  |
| 2358360 | <b>ECM1</b>      | NM_004425    | 0.0242617 | 1.2693   |
| 3567187 | <b>DHRS7</b>     | NM_016029    | 0.0242844 | -1.30511 |
| 3696554 | <b>TMED6</b>     | NM_144676    | 0.0243984 | 1.21077  |
| 3251926 | <b>KIAA0913</b>  | NM_015037    | 0.0244411 | 1.32636  |
| 3269280 | <b>FAM175B</b>   | NM_032182    | 0.0244818 | -1.22189 |
| 2439944 | <b>PIGM</b>      | NM_145167    | 0.0244975 | 1.30715  |
| 2329041 | <b>KIAA1522</b>  | NM_020888    | 0.0245579 | 1.363    |
| 3662139 | <b>MT1E</b>      | NM_175617    | 0.0245638 | -1.40818 |
| 3645253 | <b>SRRM2</b>     | NM_016333    | 0.0246528 | 1.20863  |
| 3740201 | <b>MYO1C</b>     | NM_001080779 | 0.0246819 | 1.25895  |
| 2374746 | <b>NAV1</b>      | NM_020443    | 0.0248039 | 1.31087  |
| 3504760 | <b>ZDHHC20</b>   | NM_153251.3  | 0.0249967 | -1.32794 |

---
